# Supplementary material for: Regeneration of irradiation-damaged esophagus by local delivery of mesenchymal stem-cell spheroids encapsulated in a hyaluronic-acid-based hydrogel
Source: Royal Society of Chemistry journal article supplement (doi:10.1039/d0bm01655a), 2021-01-01
Supplement: d0bm01655a1.pdf [file d0bm01655a1.pdf]

## Supplemental Information

### **Regeneration of irradiation-damaged esophagus by local delivery of mesenchymal stem-cell spheroids encapsulated in a hyaluronic-acid-based hydrogel**

In Gul Kim<sup>a</sup>, Hana Cho<sup>a</sup>, Jisoo Shin<sup>b</sup>, Jung Ho Cho<sup>b</sup>, Seung-Woo Cho<sup>\*b</sup>, Eun-Jae Chung<sup>\*a,c</sup>

<sup>a</sup>Department of Otorhinolaryngology-Head and Neck Surgery, Biomedical Research Institute, Seoul National University Hospital, Seoul, Republic of Korea

<sup>b</sup>Department of Biotechnology, Yonsei University, Seoul, South Korea

<sup>c</sup>Department of Otorhinolaryngology-Head and Neck Surgery, Seoul National University College of Medicine, Seoul, Republic of Korea

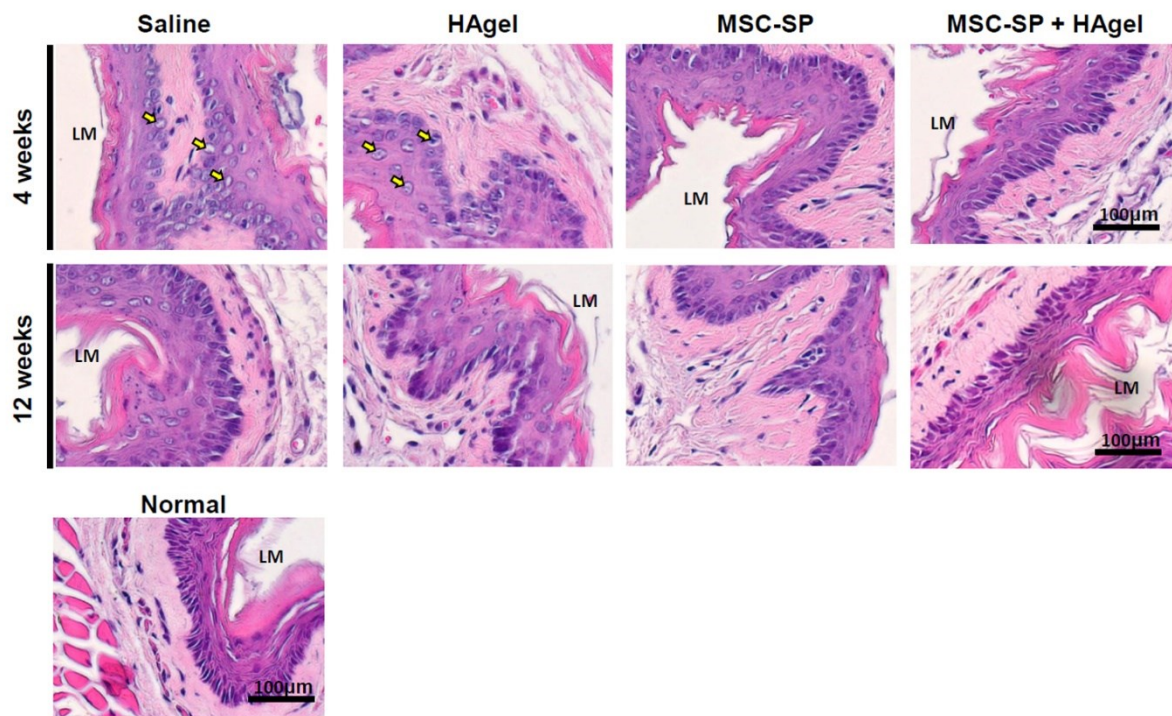

**Supplementary figure 1.** Histological evaluation of epithelium (EPI) via H & E staining at 4 and 12 weeks post-esophageal injection. The yellow arrows indicate the enlargement of epithelial cells (cytoplasmic vacuolization). (LM, lumen)

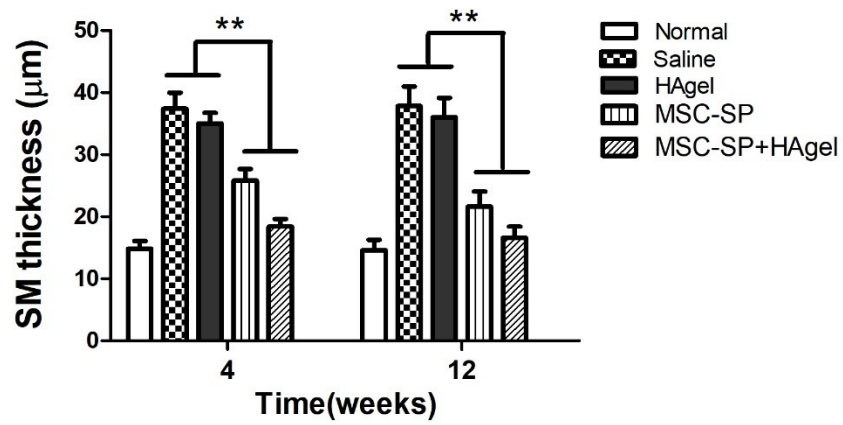

**Supplementary figure 2.** Quantitative analysis of esophageal submucosa layer. The thickness of the SM (submucosa) was significantly reduced in the two experimental groups injected with MSC-SPs compared to the normal and saline group. (\*\* $p < 0.01$ )

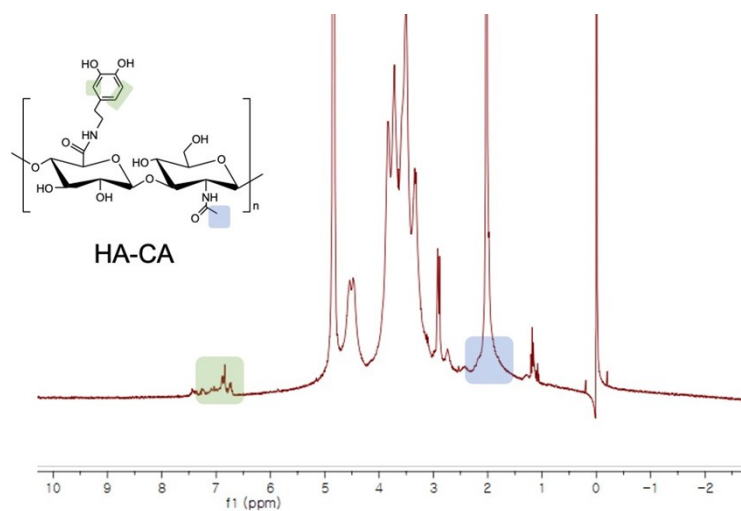

**Supplementary figure 3.  $^1\text{H}$ -NMR spectrum of HA-CA conjugate.** The peak at 2.0 ppm represented acetyl group of HA backbone and the peaks at 6.8 ppm represented three aromatic ring protons of catechol group.
